# Supplementary material for: Molecular Basis of Mink ACE2 Binding to SARS-CoV-2 and Its Mink-Derived Variants
Source: PubMed Central journal article supplement (PMC9472616; doi:10.1128/jvi.00814-22), 2022-08-24
Supplement: jvi.00814-22-s0001.pdf [file jvi.00814-22-s0001.pdf]

Molecular basis of mink ACE2 binding to SARS-CoV-2 and its mink-derived variants

Chao Su<sup>a,b</sup>, Juanhua He<sup>b,c</sup>, Pengcheng Han<sup>b,d</sup>, Bin Bai<sup>b,e</sup>, Dedong Li<sup>b,f</sup>, Jian Cao<sup>b</sup>,  
Mingxiong Tian<sup>b,g</sup>, Yu Hu<sup>b,h</sup>, Anqi Zheng<sup>b,d</sup>, Sheng Niu<sup>b,i</sup>, Qian Chen<sup>b,j</sup>, Xiaoyu Rong<sup>b,k</sup>,  
Yanfang Zhang<sup>b</sup>, Weiwei Li<sup>b</sup>, Jianxun Qi<sup>b</sup>, Xin Zhao<sup>b,l</sup>, Mengsu Yang<sup>a,#</sup>, Qihui Wang<sup>b,#</sup>,  
George Fu Gao<sup>a,b,c,#</sup>

## Supplemental Information

**Table S1. Interaction between AmkACE2 and RBD F486L or RBD Y453F**

| AmkACE2 | RBD F486L                                                                 | RBD Y453F                                                                |
|---------|---------------------------------------------------------------------------|--------------------------------------------------------------------------|
| S19     | G476 (5), S477 (2)                                                        |                                                                          |
| L24     | A475 (4), G476 (2), N487 (7),<br>Y489 (1)                                 | A475 (3), G476 (2), N487 (5)                                             |
| T27     | F456 (9), Y473 (1), A475 (2),<br>Y489 (6)                                 | F456 (5), Y473 (1), Y489 (2)                                             |
| F28     | Y489 (7)                                                                  | Y489 (6)                                                                 |
| E30     | K417 (9), L455 (4), F456 (8)                                              | K417 (3), L455 (4), F456 (6)                                             |
| K31     | L455 (5), F456 (12), Y489 (8),<br>F490 (3, <u>1</u> ), L492 (1), Q493 (1) | L455 (1), F456 (5), Y489 (5),<br>F490 (1), L492 (1), Q493 (2, <u>1</u> ) |
| Y34     | R403 (5), Y453 (20), Q493 (6),<br>S494 (1), Y495 (5)                      | F453 (5), L455 (5), Q493 (5)                                             |
| E35     | Q493 (4)                                                                  |                                                                          |
| E37     | Y505 (11)                                                                 | Y505 (5, <u>1</u> )                                                      |
| E38     | Y449 (7, <u>1</u> ), S494 (1), Y495 (1),<br>G496 (10)                     | G496 (5)                                                                 |
| Y41     | Q498 (9), T500 (7, <u>1</u> ), N501 (12)                                  | Q498 (4), T500 (3, <u>1</u> ), N501 (3)                                  |
| Q42     | G446 (6), Y449 (6, <u>1</u> ), Q498 (6, <u>1</u> )                        | G446 (1), Y449 (2), Q498 (1, <u>1</u> )                                  |
| L45     | Q498 (3), T500 (2)                                                        |                                                                          |
| H79     | L486 (6)                                                                  | F486 (7), Y489 (2)                                                       |
| T82     | L486 (6)                                                                  | F486 (2)                                                                 |
| Y83     | N487 (8), Y489 (1, <u>1</u> )                                             | N487 (1), Y489 (1)                                                       |
| N330    | T500 (5)                                                                  | T500 (2)                                                                 |
| K353    | G496 (3), N501 (12), G502 (3),<br>Y505 (27)                               | G496 (2), Q498 (1), N501 (8),<br>G502 (3), Y505 (18)                     |
| H354    | D405 (1), G502 (7), Y505 (8)                                              | G502 (6), Y505 (5)                                                       |
| D355    | T500 (9), G502 (1)                                                        | T500 (5)                                                                 |
| R357    | T500 (3)                                                                  | T500 (3)                                                                 |
| R393    | Y505 (4, <u>1</u> )                                                       |                                                                          |
| Total   | 322(7)                                                                    | 157(4)                                                                   |

The numbers in parentheses of RBD F486L or RBD Y453F residues represent the numbers of van der Waals contact the indicated residues conferred. The numbers with underline suggest numbers of potential hydrogen bonds between the pairs of residues. van der Waals contact was analyzed at a cutoff of 4.5 Å and hydrogen bonds at a cutoff

of 3.5 Å.

**Table S2. Cryo-EM data collection and refinement statistics of AmkACE2-RBD****F486L and AmkACE2-RBD Y453F**

|                                                      | AmkACE2-RBD F486L | AmkACE2-RBD Y453F |
|------------------------------------------------------|-------------------|-------------------|
| <b>Data collection</b>                               |                   |                   |
| Magnification                                        | 105K              | 96K               |
| Voltage (kV)                                         | 300               | 300               |
| Electron exposure (e <sup>-</sup> / Å <sup>2</sup> ) | 50                | 50                |
| Micrographs collected (no.)                          | 3546              | 3888              |
| Defocus range (μm)                                   | -1.0 ~ -2.0       | -1.0 ~ -2.0       |
| Pixel size (Å)                                       | 0.669             | 0.86              |
| Symmetry imposed                                     | C1                | C1                |
| Initial particle images (no.)                        | 894,852           | 1,243,791         |
| Final particle images (no.)                          | 474,881           | 410,404           |
| Map resolution (Å)                                   | 2.9               | 2.85              |
| FSC threshold                                        | 0.35              | 1.5               |
| <b>Refinement</b>                                    |                   |                   |
| Initial model used (PDB code)                        | 6LZG              | 6LZG              |
| Model composition                                    |                   |                   |
| Non-hydrogen atoms                                   | 6440              | 6455              |
| Protein residues                                     | 790               | 788               |
| Ligands                                              | 1                 | 3                 |
| <i>B</i> factors                                     |                   |                   |
| Protein                                              | 50.79             | 38.54             |
| Ligand                                               | 64.58             | 66.48             |
| R.m.s. deviations                                    |                   |                   |
| Bond lengths (Å)                                     | 0.003             | 0.003             |
| Bond angles (°)                                      | 0.575             | 0.591             |
| <b>Validation</b>                                    |                   |                   |
| MolProbity score                                     | 1.32              | 1.40              |
| Clashscore                                           | 2.39              | 0.87              |
| Poor rotamers (%)                                    | 1.59              | 3.48              |
| Ramachandran plot                                    |                   |                   |
| Favored (%)                                          | 97.20             | 96.56             |
| Allowed (%)                                          | 2.80              | 3.44              |
| Outliers (%)                                         | 0.00              | 0.00              |

**Table S3. X-ray data collection and refinement statistics of AmkACE2**

|                                                                  | AmkACE2                             |
|------------------------------------------------------------------|-------------------------------------|
| <b>Data collection</b>                                           |                                     |
| Space group                                                      | <i>P1211</i>                        |
| Cell dimensions                                                  |                                     |
| <i>a</i> , <i>b</i> , <i>c</i> (Å)                               | 67.697, 97.725, 105.063             |
| $\alpha$ , $\beta$ , $\gamma$ (°)                                | 90.0000, 91.9880, 90.0000           |
| Resolution (Å)                                                   | 71.54-2.28 (2.40-2.28) <sup>a</sup> |
| Unique reflections                                               | 61639                               |
| <i>R</i> <sub>merge</sub> <sup>b</sup>                           | 0.142 (0.591) <sup>a</sup>          |
| <i>R</i> <sub>pim</sub> <sup>c</sup>                             | 0.064 (0.332) <sup>a</sup>          |
| <i>I</i> / $\sigma$ <i>I</i>                                     | 8.6 (2.4) <sup>a</sup>              |
| <i>CC</i> <sub>1/2</sub>                                         | 0.992 (0.737) <sup>a</sup>          |
| Completeness (%)                                                 | 98.2 (99.5) <sup>a</sup>            |
| Redundancy                                                       | 5.7 (3.9) <sup>a</sup>              |
| <b>Refinement</b>                                                |                                     |
| Resolution (Å)                                                   | 42.19-2.28                          |
| No. reflections                                                  | 61059                               |
| <i>R</i> <sub>work</sub> / <i>R</i> <sub>free</sub> <sup>c</sup> | 0.2275/0.2452                       |
| No. atoms                                                        |                                     |
| Protein                                                          | 9884                                |
| Ligand/ion                                                       | 96                                  |
| Water                                                            | 326                                 |
| <i>B</i> -factors                                                |                                     |
| Protein                                                          | 39.76                               |
| Ligand/ion                                                       | 76.63                               |
| Water                                                            | 36.76                               |
| R.m.s. deviations                                                |                                     |
| Bond lengths (Å)                                                 | 0.003                               |
| Bond angles (°)                                                  | 0.568                               |
| Ramachandran plot                                                |                                     |
| Favored (%)                                                      | 98.49                               |
| Allowed (%)                                                      | 1.25                                |
| Outliers (%)                                                     | 0.25                                |

<sup>a</sup> Values in parentheses are for highest-resolution shell.

## Supplementary Figure legends

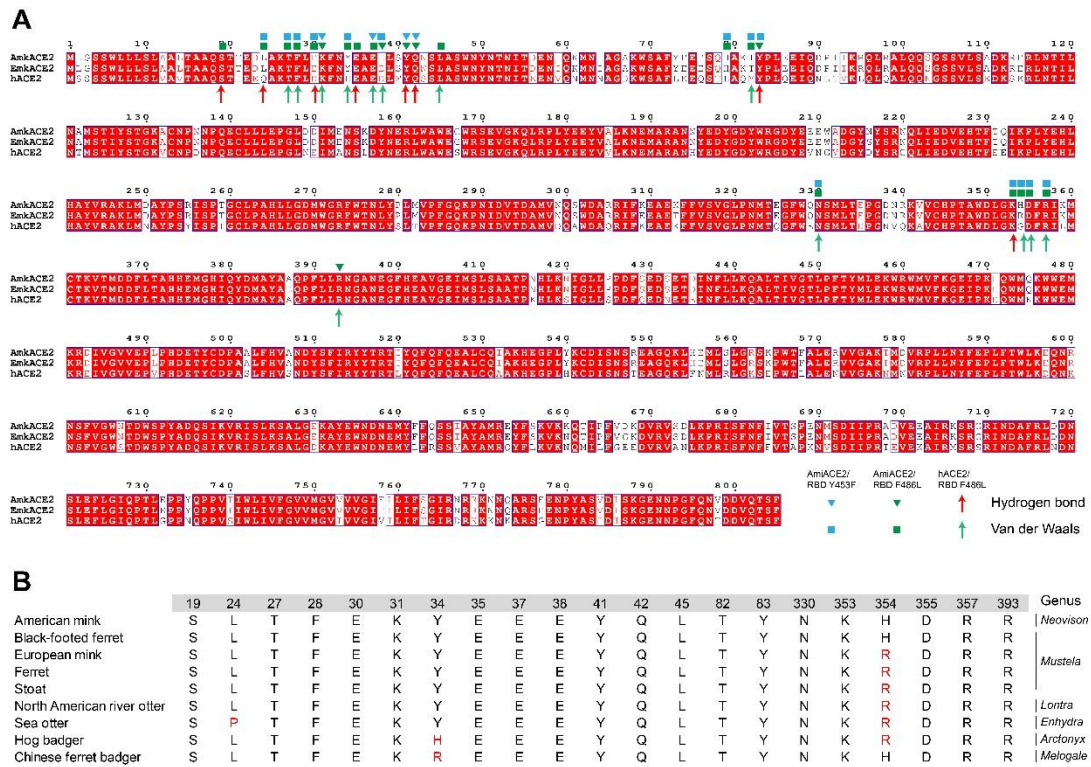

Fig. S1. Sequence analysis of ACE2 proteins. (A) Sequence alignment of ACE2 proteins from Amink, European mink (Emink), and human. The cyan and green square indicate amino acids in AmkACE2 that contribute to bind to RBD Y453F or RBD F486L *via* van der Waals, respectively. The cyan and green triangle indicate amino acids in AmkACE2 that are involved in interacting with RBD Y453F or RBD F486L through hydrogen bond, respectively. The red and green arrow indicate amino acids in hACE2 that are involved in interacting with RBD F486L *via* hydrogen bond and van der Waals, respectively. Sequence alignment was produced by ESPrnt [1]. The GenBank accession codes: AmkACE2: QPL12211; EmkACE2: QNC68911.1; hACE2: NP\_001358344. (B) The nine species belonging to six genera of Mustelidae are shown in the right column. Twenty-one residues of AmkACE2 which are crucial in interacting with the SARS-CoV-2 RBD are listed. Red letters indicate the substitutions in the ACE2

of eight species. The GenBank accession codes: Black-footed ferret: QNC68914.1; Ferret: NP\_001297119.1; Stoat: XP\_032187679.1; North American river otter: XP\_032736029.1; Sea otter: XP\_022374078.1; Hog badger: QLF98526.1; Chinese ferret badger: QLF98521.1.

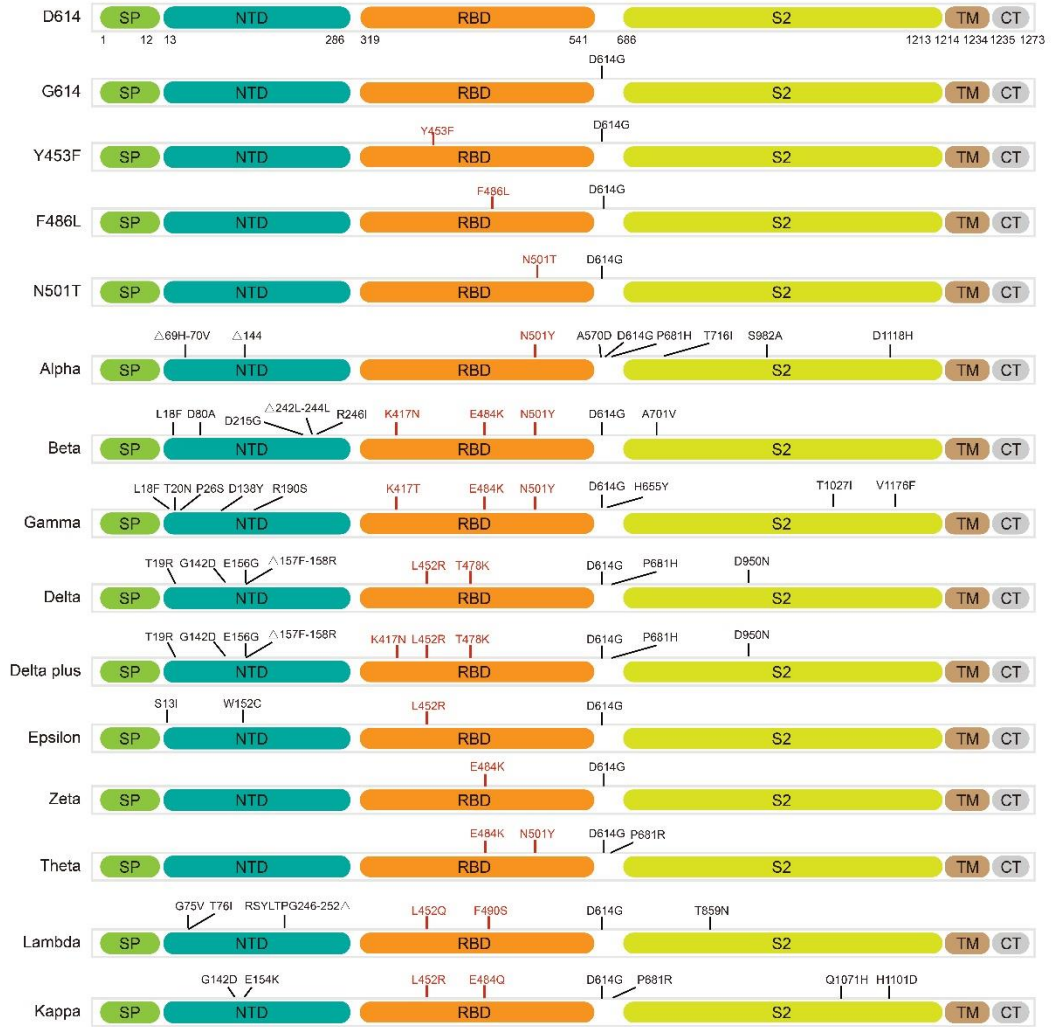

Fig. S2. Schematic representation of SARS-CoV-2 prototype (D614) and variant S proteins. The mutations of amino acids and positions are as indicated. SP: signal peptide, NTD: N-terminal domain, RBD: receptor-binding domain, TM: transmembrane, CT: C-terminal cytoplasmic tail domain.



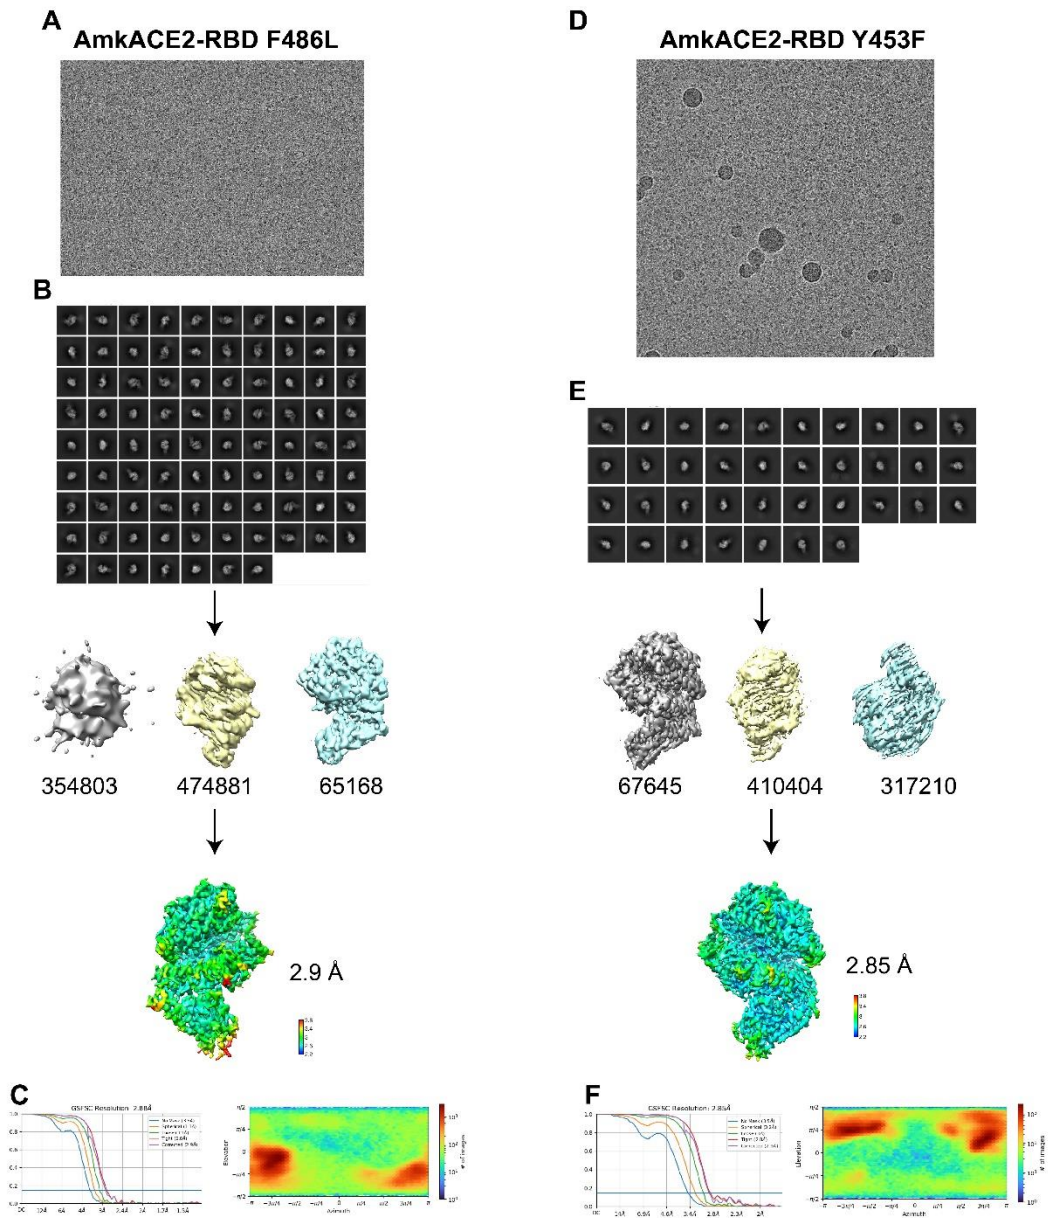

Fig. S3. EM data processing of AmkACE2-RBD F486L and AmkACE2-RBD Y453F complex. (A and D) One of raw cryo-EM micrographs. (B and E) Schematic to show steps in cryo-EM data processing. (C and F) FSC curve (left) and viewing direction distribution (right) of the map.

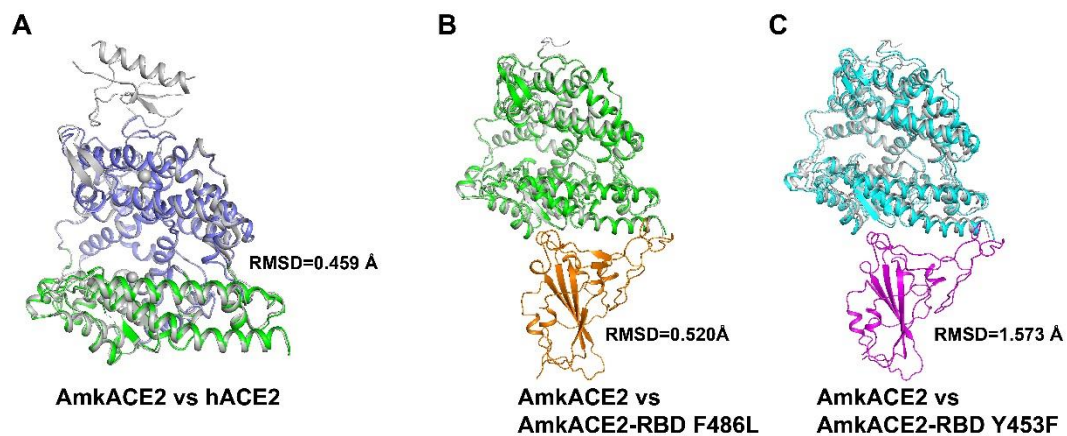

Fig. S4. Structural comparison of AmkACE2 with hACE2 or AmkACE2-RBD F486L or AmkACE2-RBD Y453F. (A) Superimposition of AmkACE2 and hACE2. RMSD is shown. hACE2 is colored in gray. Subdomain I and subdomain II of AmkACE2 are colored in green and blue, respectively. (B-C) Superimposition of AmkACE2 and AmkACE2-RBD F486L (B) or AmkACE2-RBD Y453F (C). AmkACE2 is colored in gray. RMSD is shown.

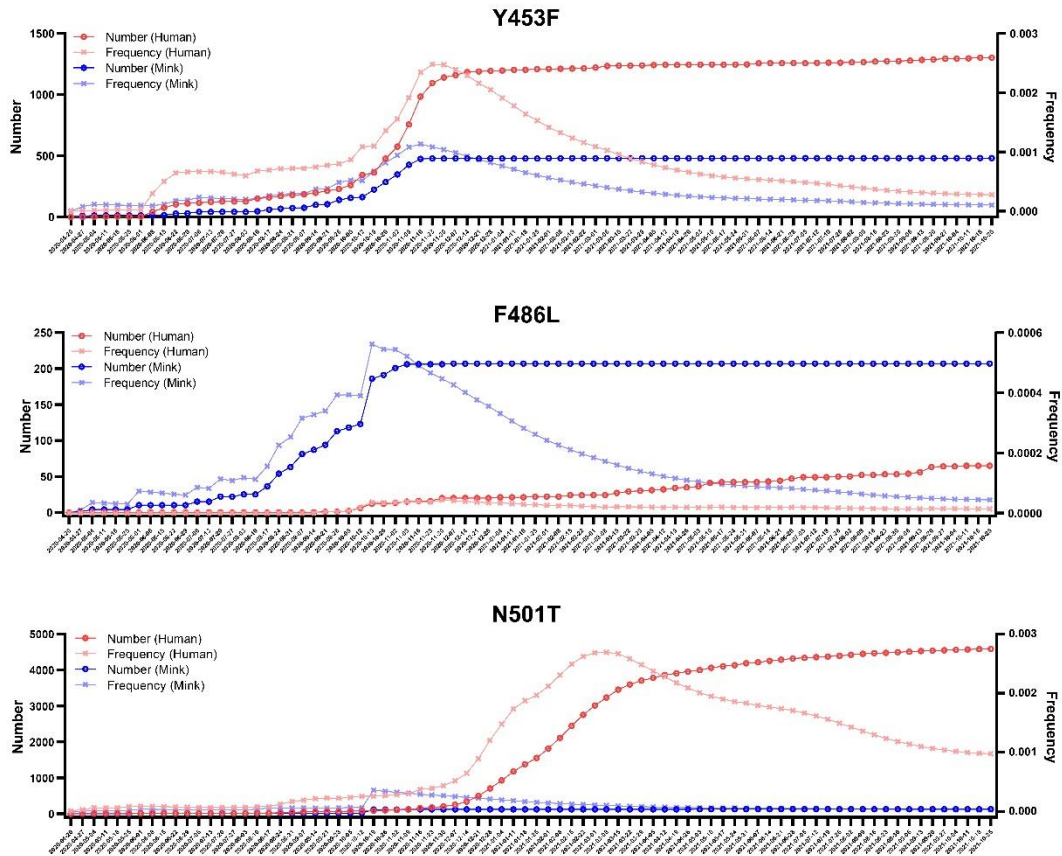

Fig. S5. Number and frequency of SARS-CoV-2 variant S sequences in the GISAID Initiative database. The cumulative weekly number and frequency of S sequence respectively carrying the Y453F (top), F486L (middle), or N501T (bottom) mutation in humans and minks were calculated between April 20, 2020 and October 25, 2021.

## References

1. Robert, X. and P. Gouet, *Deciphering key features in protein structures with the new ENDscript server*. Nucleic Acids Res, 2014. **42**(Web Server issue): p. W320-4.
